# Supplementary material for: HLA-A and HLA-DRB1 may play a unique role in ovarian teratoma-associated anti-N-methyl-D-aspartate receptor encephalitis
Source: PubMed Central journal article supplement (PMC7648266; doi:10.1186/s12958-020-00661-5), 2020-11-07
Supplement: 12958_2020_661_MOESM2_ESM.pdf [file 12958_2020_661_MOESM2_ESM.pdf]

■ Cellular Processes  
 ■ Environmental Information Processing  
 ■ Genetic Information Processing  
 ■ Human Diseases  
■ Metabolism  
 ■ Organismal Systems

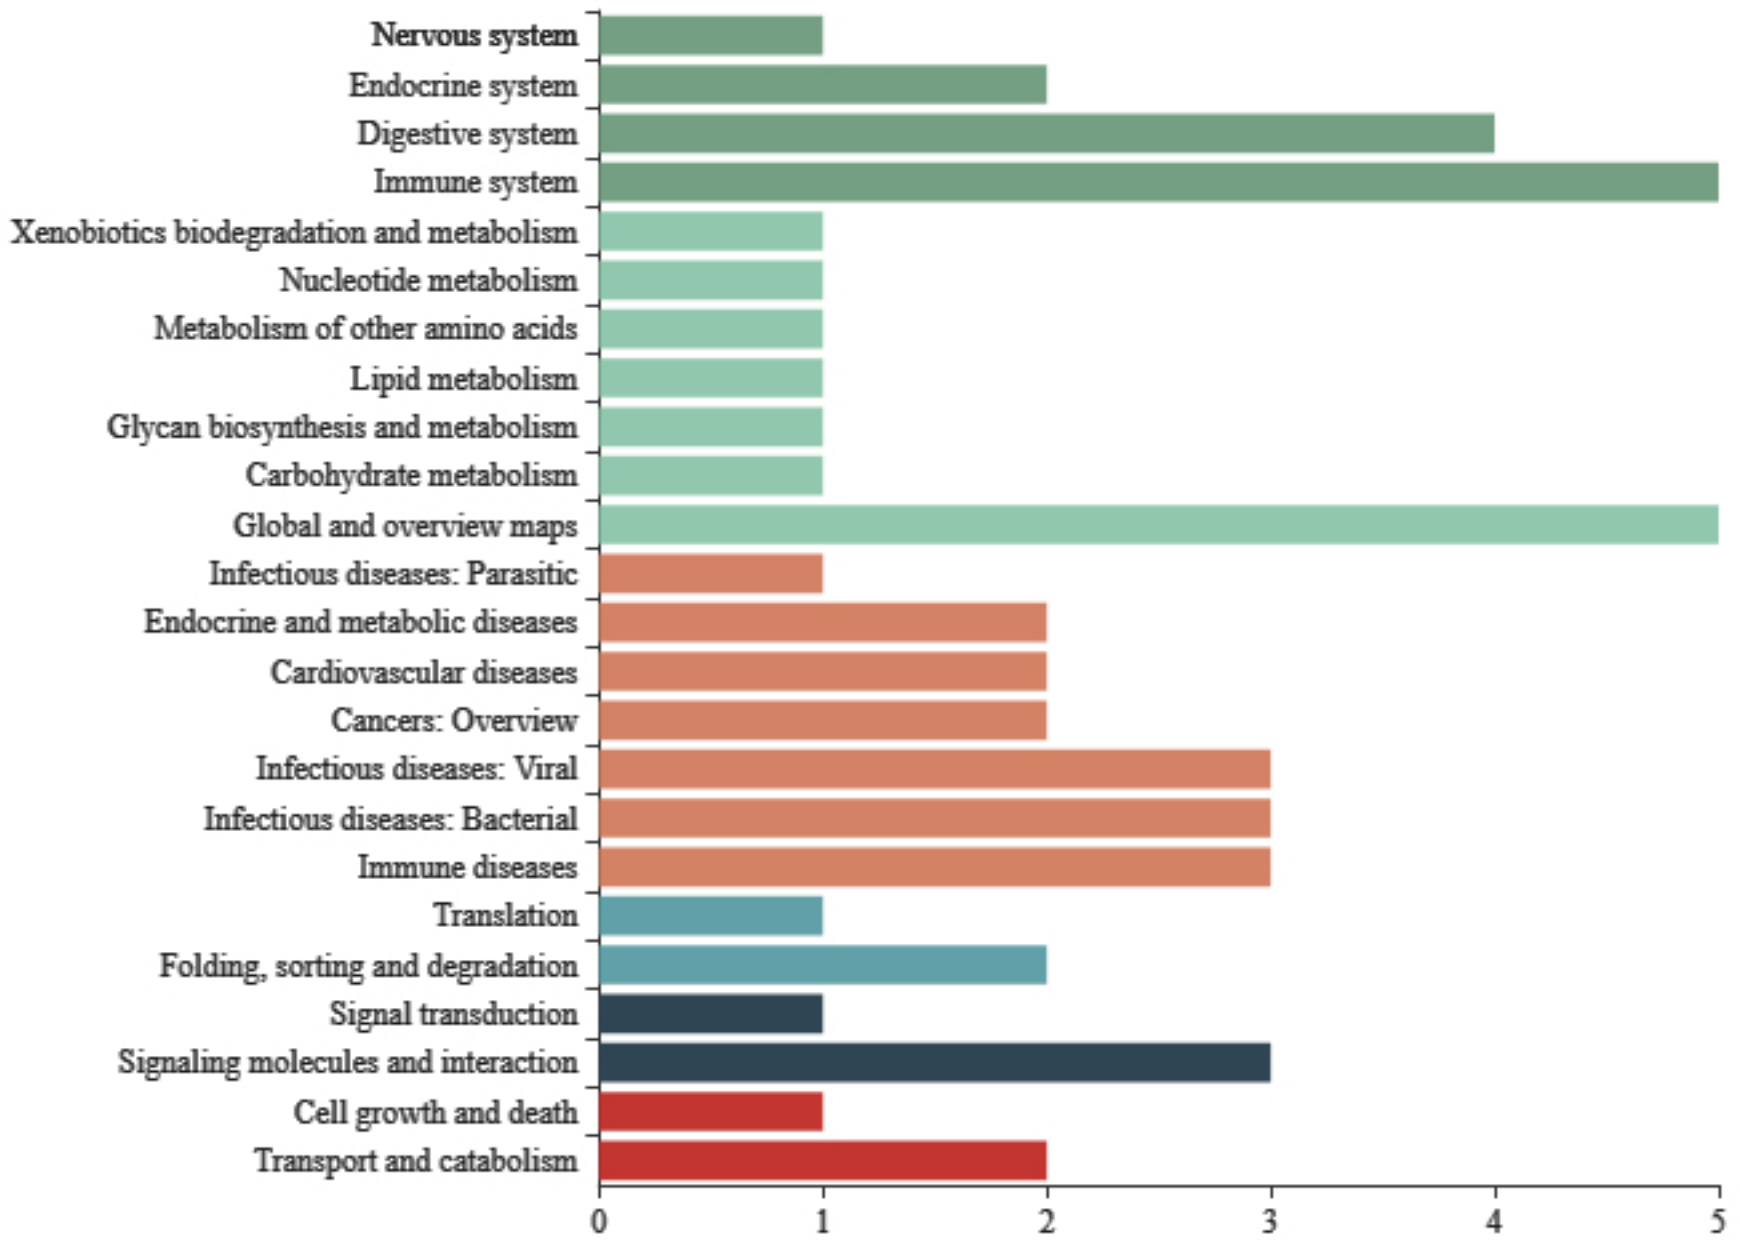

**Number of Proteins**
